# Supplementary material for: Comparative development and ocular histology between epigean and subterranean salamanders (Eurycea) from central Texas
Source: PubMed Central journal article supplement (PMC8325428; doi:10.7717/peerj.11840), 2021-07-28
Supplement: peerj-09-11840-s002.pdf [file peerj-09-11840-s002.pdf]

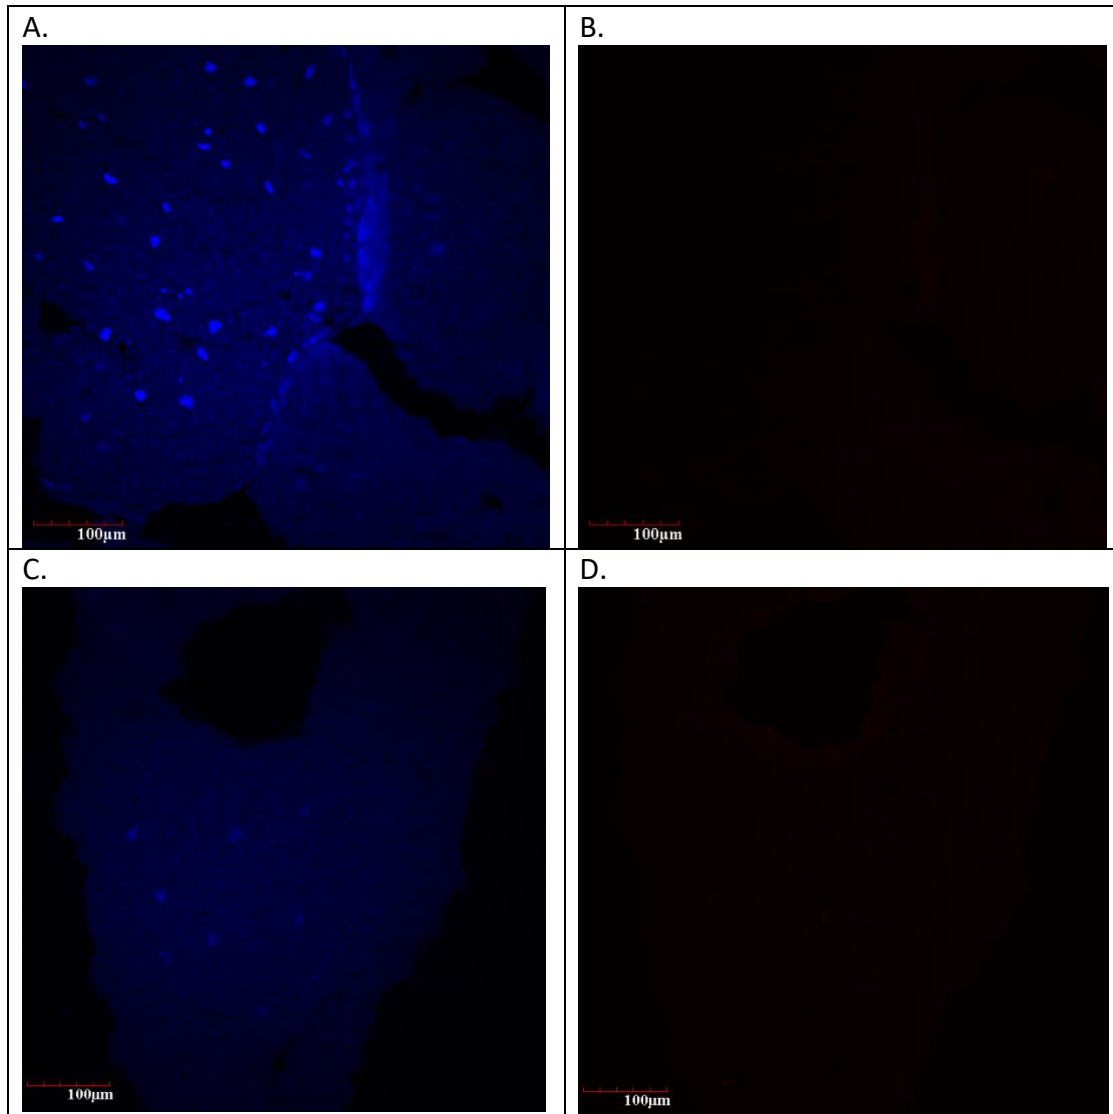

**Supplementary File 2. Negative controls of a stage 40 for *E. rathbuni* embryo (panels A and B) and *E. sosorum* (panels C and D).** Panels A and C show Hoechst (nuclear) staining. Panels B and D show negative (no primary antibody) controls for Pax6 labeling. Images were taken with the same settings as experimental sections shown in Figure 4 in the manuscript.
