# Supplementary material for: Comparative development and ocular histology between epigean and subterranean salamanders (Eurycea) from central Texas
Source: PubMed Central journal article supplement (PMC8325428; doi:10.7717/peerj.11840), 2021-07-28
Supplement: peerj-09-11840-s004.pdf [file peerj-09-11840-s004.pdf]

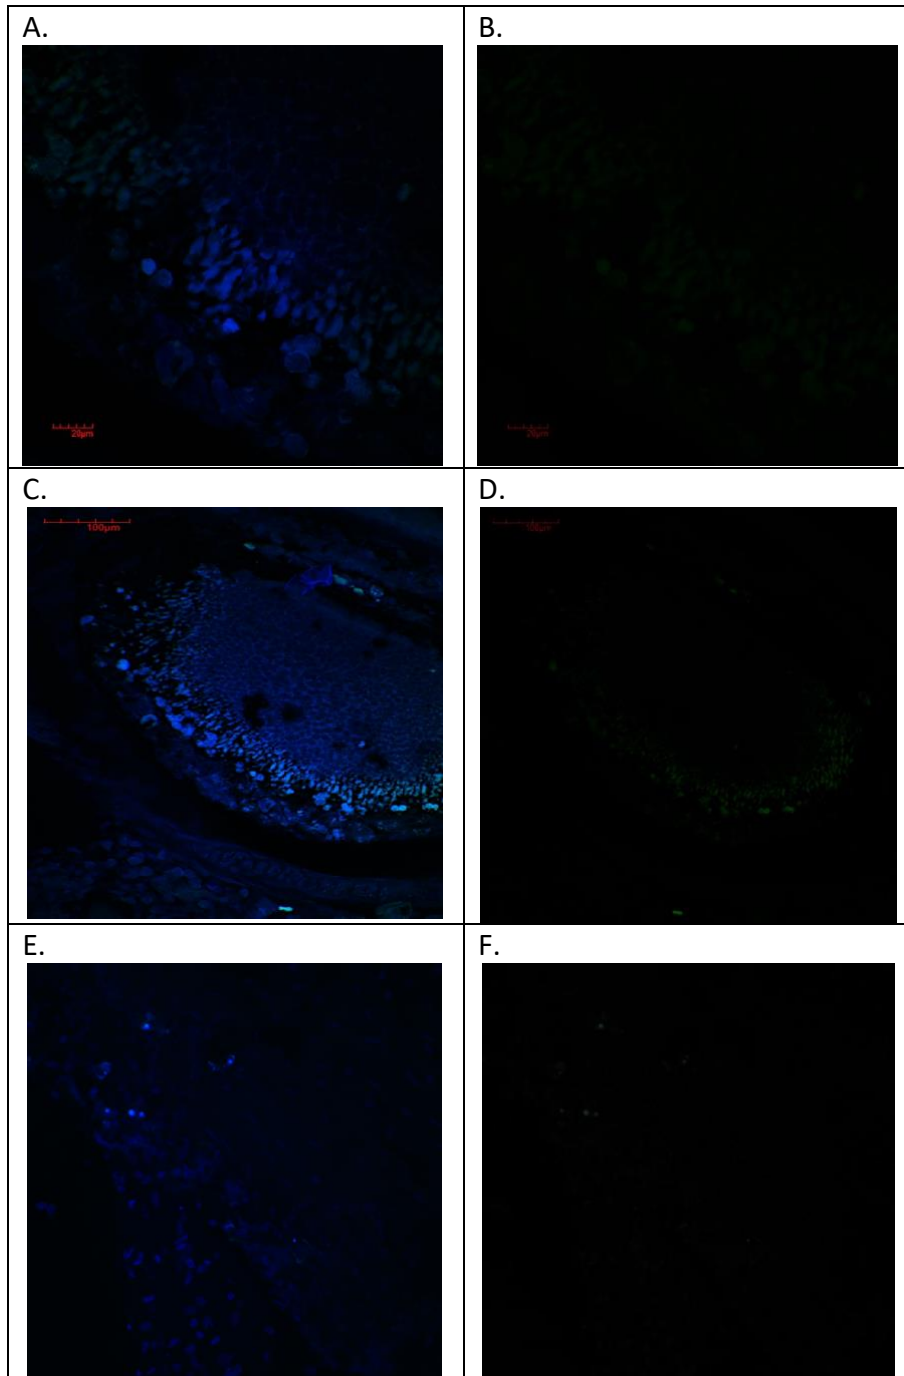

**Figure ###.** Negative controls for rhodopsin in adult *E. nana* (Panels A&B), *E. sosorum* (Panels C&D), and *E. rathbuni* (Panels E&F). Panels A, C, and E show Hoechst (nuclear) staining. Panels B, D, and F show negative (no primary antibody) controls for rhodopsin labeling. Images were taken with the same settings as experimental sections shown in Figure ### in the manuscript.
